# Supplementary material for: Promoting water splitting on arrayed molybdenum carbide nanosheets with electronic modulation
Source: Royal Society of Chemistry journal article supplement (doi:10.1039/d1ta05710c), 2021-01-01
Supplement: d1ta05710c1.pdf [file d1ta05710c1.pdf]

## Supporting Information

### Promoting water splitting on arrayed molybdenum carbide nanosheets with electronic modulation

Jinxiang Diao<sup>‡</sup>, Xiaolin Li<sup>‡</sup>, Shuya Wang, Zejun Zhao, Weitao Wang, Kai Chen, Tingting Chao\*, Yong Yang\*

#### Experiment Section

*Preparation of N-Mo<sub>2</sub>C*: All the chemical reagents were of analytical grade and used without further purification. Two piece of Ni foam (2 cm×1.5 cm) were cleaned ultrasonically in 2 M HCl for 30 min and washed with water and absolute alcohol for 3 times. Then 0.6 g (NH<sub>4</sub>)<sub>6</sub>Mo<sub>7</sub>O<sub>24</sub>·4H<sub>2</sub>O was dissolved in 30 mL of water, and 880 μL ethylenediamine (EDA) were dissolved in 30 mL of distilled water under continuities stirring. The feed percentage of ethylenediamine (EDA) was 440 μL and 1320 μL respectively. Then, the pH value of solution was adjusted to 4-5 using 2 M HCl until the white precipitate appears. The mixture solution was transferred into a 50 mL Teflon-lined stainless steel autoclave, and Ni foam was placed upright in the autoclave. The autoclave was heated to 150 °C in an electric oven and maintained for 12 h. After that Ni foam with precursor was cleaned with ethanol and deionized water for several times before being fully dried in a vacuum oven at 60 °C for overnight. Then the Ni foam with precursor was reduced at 450 °C for 2 h in H<sub>2</sub>/Ar (v/v, 5/95) atmosphere to achieved sample. According to their XPS result, they are denoted as N-Mo<sub>2</sub>C-1/NF (2.25 awt%), N-Mo<sub>2</sub>C/NF (6.78 awt%) and N-Mo<sub>2</sub>C-3/NF (10.25 awt%). Further 20 wt% Pt/C, IrO<sub>2</sub> and Ni foam was tested for comparison.

*Preparation of Mo<sub>2</sub>C and Mo<sub>2</sub>N* : MoO<sub>3</sub>-EDA precursor was synthesized via the previously described method.<sup>[1]</sup> 500 mg MoO<sub>3</sub>-EDA was transferred into a tube furnace and heated to the temperature of 650 °C at a heating rate of 5 °C min<sup>-1</sup> and holding for 3 h under the atmosphere of 5 vol % H<sub>2</sub>/Ar. After naturally cooling down, the Mo<sub>2</sub>C was obtained. Under the NH<sub>3</sub> atmosphere, the Mo<sub>2</sub>N were obtained.

*Structural Characterization:* Powder X-ray diffraction (XRD) of all samples was performed on a Bruker D8 ADVANCE diffractometer using Cu K $\alpha$  radiation. The morphology and nanostructure of N-Mo<sub>2</sub>C was observed by high-resolution field emission SEM (JEOL JSM-6390A) and transmission electron microscope (TEM, G<sup>2</sup> F20 S-TWIN), aberration-corrected HAADF-STEM instrument (Themis Z, FEI) at 300 kV together with a SEM (SU8220, Hitachi) at 15 kV. The specific surface areas and the distribution of pore size were tested by N<sub>2</sub> adsorption at 77 K, using instrument Micromeritics Tristar-3020. The chemical state of the elements in N-Mo<sub>2</sub>C was measured by X-ray photoelectron spectroscopy (XPS) on a Thermo Fisher Escalab 250Xi. X-ray monochromator was microfocused Al K $\alpha$  radiation. Raman spectra was obtained from Renishaw Ramanscope. X-ray absorption fine structure (XAFS) spectra at the W K-edge were recorded at the 1W1B station of Beijing Synchrotron Radiation Facility (BSRF), China.

*Electrochemical Measurements:* All the electrochemical measurements were carried out were performed on a CHI 700E electrochemical workstation (CH Instruments, China). For HER and OER, the Ni supported N-Mo<sub>2</sub>C was directly used as the working electrodes with testing area of 0.25 cm<sup>2</sup>. A saturated Ag/AgCl and a graphite rod was used as the reference electrode and counter electrode. Electrochemical impedance spectroscopy (EIS) was carried out in frequency range of 100 kHz-0.1Hz under a potential of 100 mV in KOH solution. In addition, the double layer capacitance (C<sub>dl</sub>) was evaluated from the relationship of the capacitive current ( $\Delta j = j_{\text{anodic}} - j_{\text{cathodic}}$ ) vs. potential scan rates, which was considered to be proportional to electrochemical active surface area (ECSA).<sup>[2]</sup>

The overall water splitting is performed in a two-electrode system. The long-term potential vs. time plots were obtained under a current density of 10 mA·cm<sup>-2</sup> for 24 h.

*IR-correction:* Unless stated otherwise, all polarization curves measured in a threeelectrode configuration are *iR*-corrected. The correction was done according to the following equation:

$$E_{\text{corr}} = E_{\text{mea}} - iR_c$$

Where  $E_{\text{corr}}$  is  $iR$ -corrected potential,  $E_{\text{mea}}$  experimentally measured potential, and  $R_c$  is the compensated resistance<sup>[3]</sup>.

*DFT theoretical calculations:* The present first principle DFT calculations are performed with the projector augmented wave (PAW) method.<sup>[4]</sup> The gradient approximation (GGA) with Perdew-Burke-Ernzerhof (PBE) functional was used for exchange-functional. The cut-off energy of the plane-wave basis is set at 400 eV. The vacuum spacing in a direction perpendicular to the plane of the catalyst is at least 10 Å. The Brillouin zone integration is performed using  $3 \times 3 \times 1$  Monkhorst and Pack k-point sampling for a primitive cell. All the atoms in these structures were fully relaxed to using the conjugated gradient method until a convergence criterion of  $10^{-6}$  eV for energy and 0.03 eV/Å for force.

The OER is considered, as below:

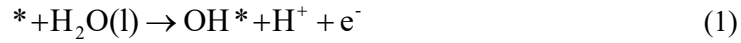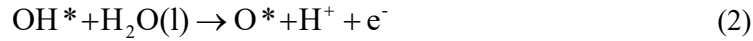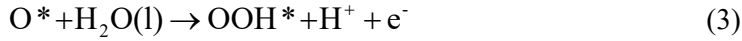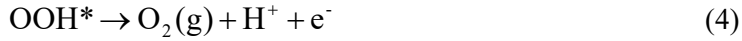

where \* is an adsorption site on catalysts. l and g is liquid and gas phases, respectively.

Therefore, the  $\Delta G$  for each step can be calculated by:

$$\square G_1 = G(\text{OH}^*) + G(\text{H}^+ + \text{e}^-) - G(\text{H}_2\text{O}) - G(*)$$

$$= \{ \square G_{\text{OH}^*} + G(*) + [G(\text{H}_2\text{O}) - 1/2G(\text{H}_2)] \} + 1/2G(\text{H}_2) - G(\text{H}_2\text{O}) - G(*)$$

$$= \square G_{\text{OH}^*}$$

$$\square G_2 = G(\text{O}^*) + G(\text{H} + \text{e}^-) - G(\text{OH}^*)$$

$$= \{ \square G_{\text{O}^*} + G(*) + [G(\text{H}_2\text{O}) - G(\text{H}_2)] \} + 1/2G(\text{H}_2) - \{ \square G_{\text{OH}^*} + G(*) + [G(\text{H}_2\text{O}) - 1/2G(\text{H}_2)] \}$$

$$= \square G_{\text{O}^*} - \square G_{\text{OH}^*}$$

$$\square G_3 = G(\text{OOH}^*) + G(\text{H}^+ + \text{e}^-) - G(\text{O}^*) - G(\text{H}_2\text{O})$$

$$= \{ \square G_{\text{OOH}^*} + G(*) + [2G(\text{H}_2\text{O}) - 3/2G(\text{H}_2)] \} + 1/2G(\text{H}_2) - \{ \square G_{\text{O}^*} + G(*) + [G(\text{H}_2\text{O}) - G(\text{H}_2)] \} - G(\text{H}_2\text{O})$$

$$= \square G_{\text{OOH}^*} - \square G_{\text{O}^*}$$

$$\square G_4 = G(\text{O}_2) + G(\text{H} + \text{e}^-) - G(\text{OOH}^*)$$

$$\begin{aligned}
&= \{4.92 + 2G(\text{H}_2\text{O}) - 2G(\text{H}_2)\} + 1/2G(\text{H}_2) - \{\Delta G_{\text{OOH}^*} + G(*) + [2G(\text{H}_2\text{O}) - 3/2G(\text{H}_2)]\} \\
&= 4.92 - \Delta G_{\text{OOH}^*}
\end{aligned}$$

Then the free energies can be obtained by including the zero point energy (ZPE) and the entropy (S) corrections in equation  $G = E_{\text{ads}} - E_{\text{ZPE}} - TS$ . The  $E_{\text{ZPE}}$  could be obtained from the calculation of vibrational frequencies for the adsorbed species.

Finally, Chemisorption energies of atomic hydrogen were calculated relative to  $\text{H}_2$  (g) by:

$$E = E(\text{surface} + n\text{H}) - E(\text{surface}) - \frac{1}{2}E(\text{H}_2).$$

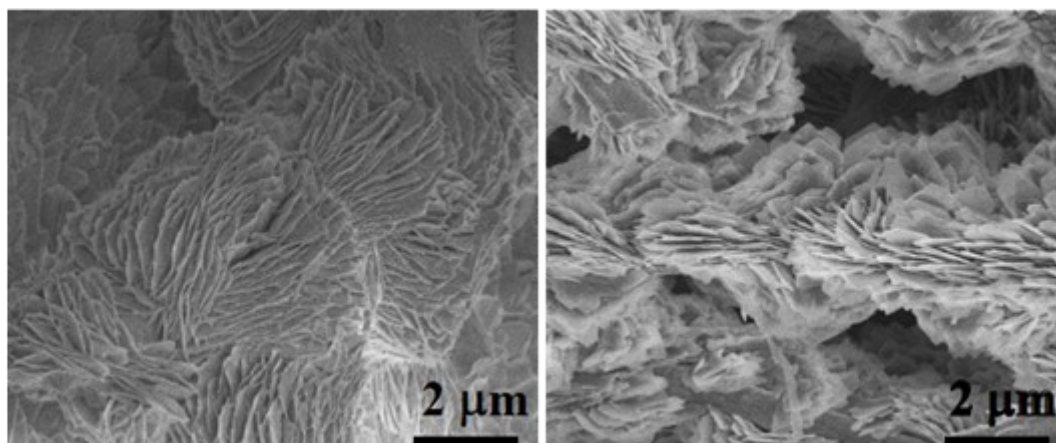

**Figure S1.** SEM of pure Mo<sub>2</sub>C/NF and Mo<sub>2</sub>N/NF.

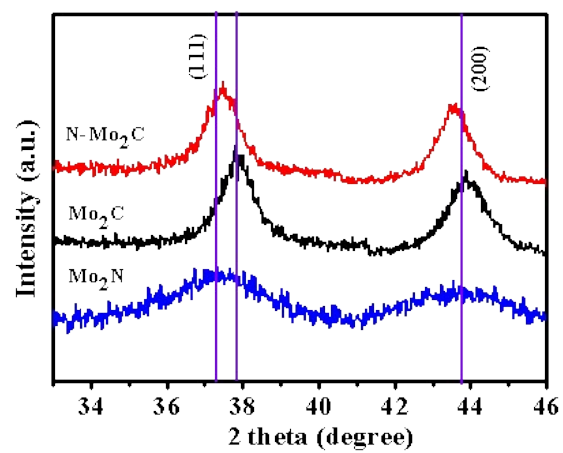

**Figure S2.** XRD of the pure N-Mo<sub>2</sub>C, Mo<sub>2</sub>C and Mo<sub>2</sub>N (zoom-in region between 33° and 46°).

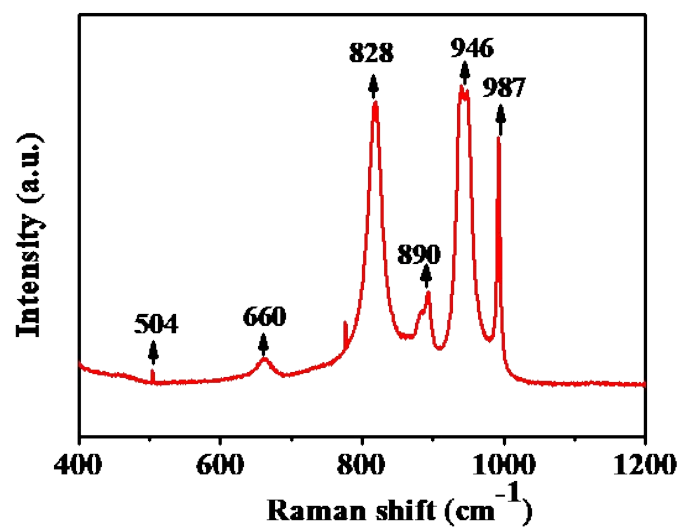

Figure S3. Raman spectra of N-Mo<sub>2</sub>C/NF.

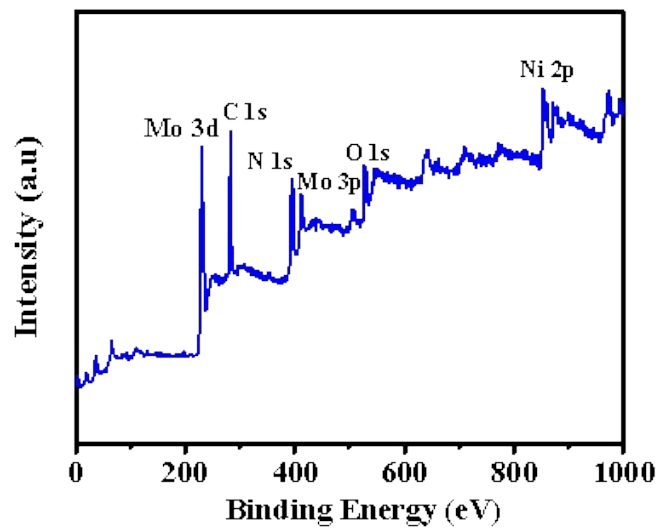

**Figure S4.** Full spectrum X-ray photoelectron spectroscopy (XPS) spectra of N-Mo<sub>2</sub>C/NF



**Table S1.** XPS fitting parameters for Mo 3d spectrum of N-Mo<sub>2</sub>C/NF, Mo<sub>2</sub>C/NF, and Mo<sub>2</sub>N/NF

| <b>Catalyst</b>        | <b>Mo3d<sub>5/2</sub><br/>(eV)</b> | <b>FWHM</b> | <b>The peak<br/>area ratio<br/>(%)</b> | <b>Mo3d<sub>3/2</sub><br/>(eV)</b> | <b>FWHM</b> | <b>The peak<br/>area ratio<br/>(%)</b> | <b>Peak<br/>shape</b> |
|------------------------|------------------------------------|-------------|----------------------------------------|------------------------------------|-------------|----------------------------------------|-----------------------|
| N-Mo <sub>2</sub> C/NF | 229.5                              | 1.65        | 60                                     | 232.7                              | 1.65        | 40                                     | GL                    |
| Mo <sub>2</sub> C/NF   | 229.0                              | 1.70        | 60                                     | 232.2                              | 1.70        | 40                                     | GL                    |
| Mo <sub>2</sub> N/NF   | 230.0                              | 1.93        | 60                                     | 233.1                              | 1.93        | 40                                     | GL                    |

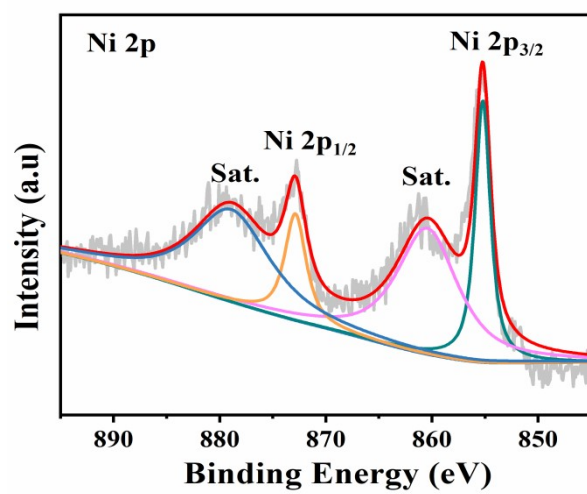

**Figure S5.** XPS spectra of Ni 2p for N-Mo<sub>2</sub>C/NF Nanosheets

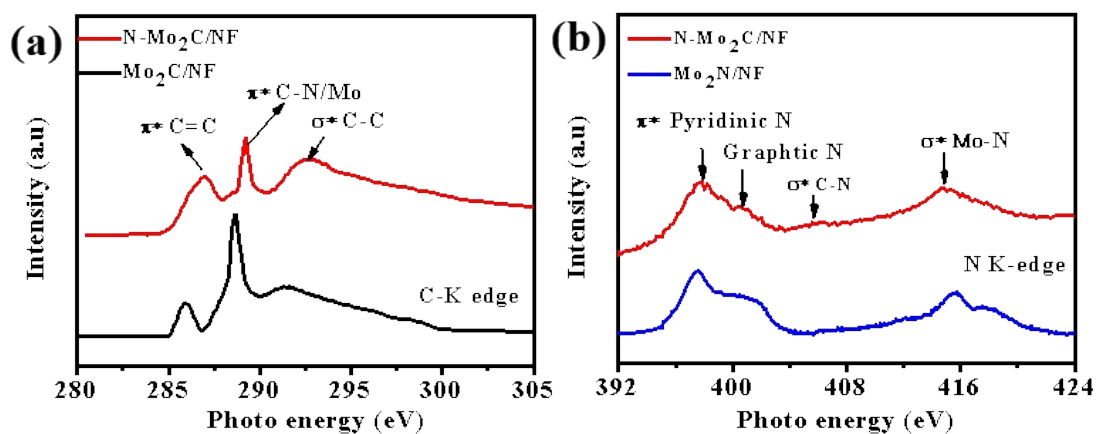

**Figure S6.** (a) C K-edge XANES spectra of the N-Mo<sub>2</sub>C/NF and Mo<sub>2</sub>C/NF. (b) N K-edge XANES spectra of the N-Mo<sub>2</sub>C/NF and Mo<sub>2</sub>N/NF.

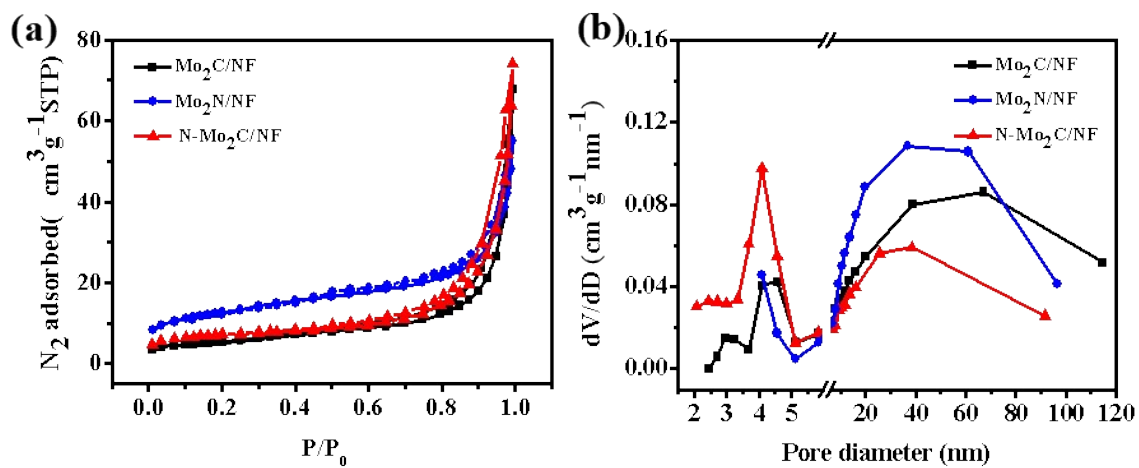

**Figure S7.** (a)  $N_2$  adsorption/desorption isotherms and of  $Mo_2C/NF$ ,  $Mo_2N/NF$  and  $N-Mo_2C/NF$ . (b) corresponding pore distribution of  $Mo_2C/NF$ ,  $Mo_2N/NF$  and  $N-Mo_2C/NF$ .

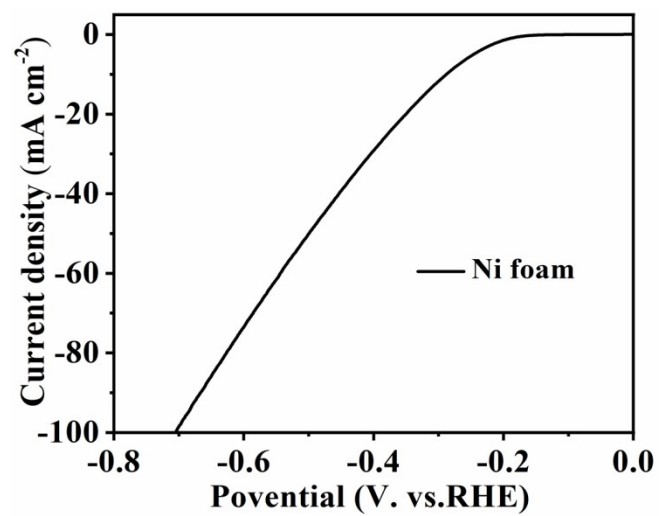

**Figure S8.** Polarization curves of Ni foam in 1.0 M KOH at scan of 5 mV s<sup>-1</sup> for HER.

**Table S2.** HER performances of N-Mo<sub>2</sub>C/NF and other reported electrocatalysts.

| Catalyst                            | Media     | (mV) at<br>$j=10\text{mAcm}^{-2}$ | Reference                                                          |
|-------------------------------------|-----------|-----------------------------------|--------------------------------------------------------------------|
| N-Mo <sub>2</sub> C/NF              | 1.0 M KOH | 83.9                              | This work                                                          |
| Ni/TMC                              | 1.0 M KOH | 128                               | <i>Adv. Energy Mater.</i> <b>2020</b> , <i>10</i> , 2002260        |
| O-Co <sub>2</sub> P-3               | 1.0 M KOH | 160                               | <i>Adv. Mater.</i> <b>2017</b> , <i>29</i> , 1606980               |
| mC-Mo-750                           | 1.0 M KOH | 145                               | <i>Adv. Funct. Mater.</i> <b>2018</b> , <i>30</i> , 1807419 .      |
| Ni <sub>2</sub> P/Ni                | 1.0M KOH  | 106                               | <i>ACS Appl. Mater. &amp; Inter.</i> <b>2015</b> , <i>7</i> , 2376 |
| Ni-Se-Mo                            | 1.0 M KOH | 101                               | <i>Int. J. of Hydrogen Energ.</i> <b>2020</b> , <i>45</i> , 6015   |
| N doped MoS <sub>2</sub>            | 1.0 M KOH | 141                               | <i>ChemElectroChem</i> <b>2020</b> , <i>7</i> , 336                |
| MoS <sub>2</sub> /MoSe <sub>2</sub> | 1.0 M KOH | 235                               | <i>Nanoscale</i> , <b>2019</b> , <i>11</i> , 717                   |
| Ni-N-C                              | 1.0 M KOH | 147                               | <i>Energy Environ. Sci.</i> <b>2019</b> , <i>12</i> , 149          |
| FeNiSe-NS/EG                        | 1.0 M KOH | 187                               | <i>Nanoscale</i> , <b>2019</b> , <i>11</i> , 17571                 |
|                                     |           |                                   |                                                                    |

**Table S3** the  $R_s$ ,  $R_{ct}$  and CPE-P and CPE-T value of N-Mo<sub>2</sub>C/NF, Mo<sub>2</sub>C/NF, Mo<sub>2</sub>N/NF and Pt/C for HER.

| <b>Catalyst</b>        | <b><math>R_s</math></b> | <b><math>R_{ct}</math></b> | <b>CPE-P</b> | <b>CPE-T</b> |
|------------------------|-------------------------|----------------------------|--------------|--------------|
| N-Mo <sub>2</sub> C/NF | 1.791                   | 27.95                      | 0.819        | 0.001        |
| Mo <sub>2</sub> C/NF   | 1.944                   | 36.30                      | 0.857        | 0.001        |
| Mo <sub>2</sub> N/NF   | 1.393                   | 62.42                      | 0.830        | 0.008        |
| Pt/C                   | 1.914                   | 6.725                      | 0.810        | 0.143        |

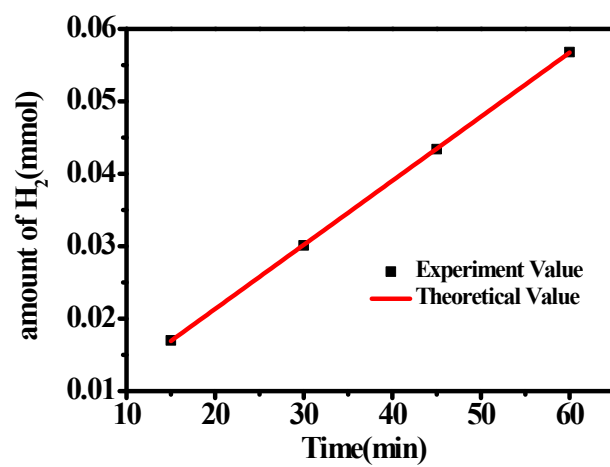

**Figure S9.** Theoretical and experimental tested H<sub>2</sub> evolution on N-Mo<sub>2</sub>C/NF



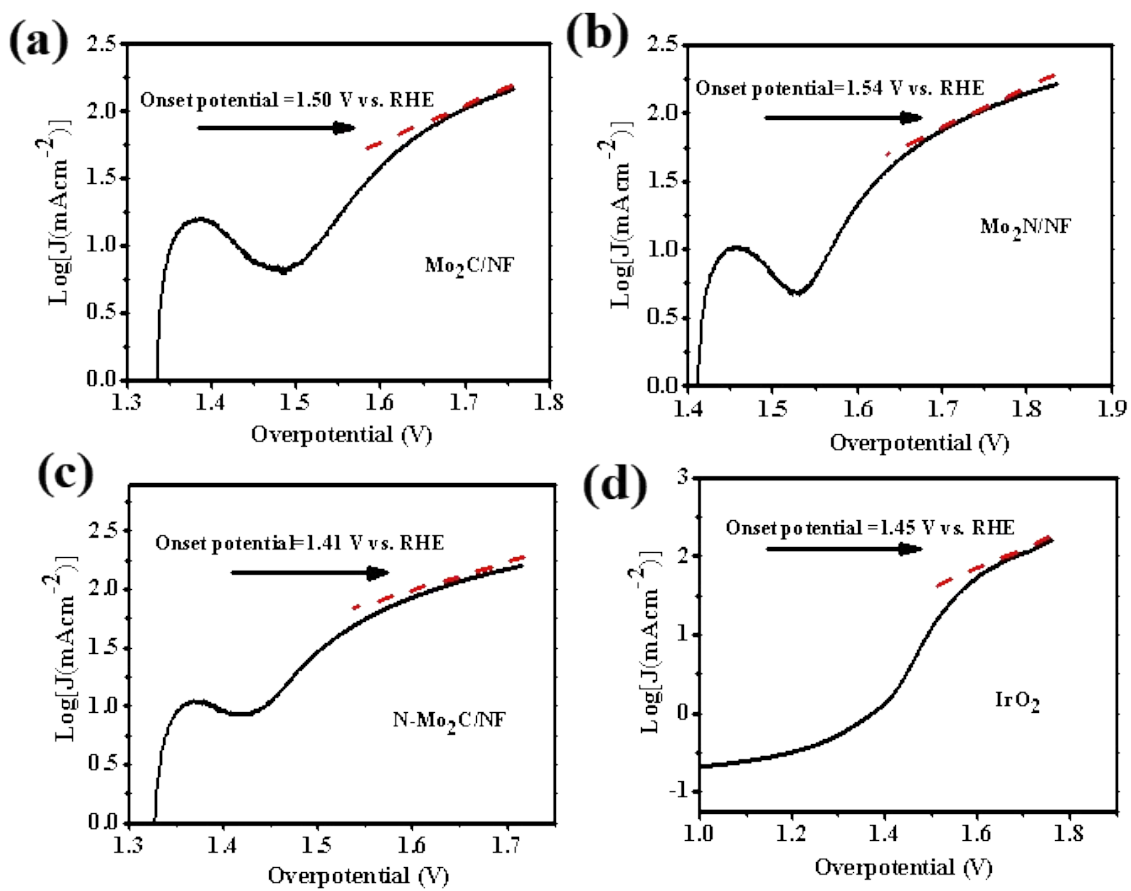

**Figure S10.** The plots of overpotential vs.  $\text{log}[J/(\text{mA cm}^{-2})]$  for  $\text{Mo}_2\text{C}/\text{NF}$  (a),  $\text{Mo}_2\text{N}/\text{NF}$  (b) and  $\text{N-Mo}_2\text{C}/\text{NF}$  (c), and  $\text{IrO}_2$  (d) respectively.

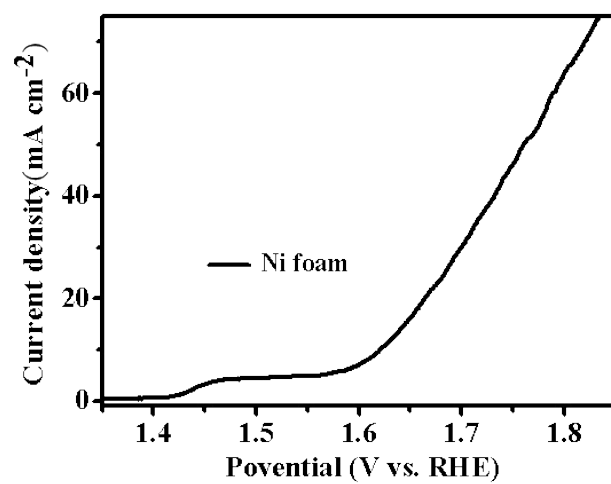

**Figure S11.** Polarzation curves of Ni foam in 1.0 M KOH at scan of 5 mV s<sup>-1</sup> for OER.

**Table S4.** OER performances of N-Mo<sub>2</sub>C/NF and other electrocatalysts reported in previously literatures.

| Catalyst                                                             | Media     | (mV) at<br>$j=10\text{mA cm}^{-2}$ | Reference                                                |
|----------------------------------------------------------------------|-----------|------------------------------------|----------------------------------------------------------|
| N-Mo <sub>2</sub> C/NF                                               | 1.0 M KOH | 230                                | This work                                                |
| MoS <sub>2</sub> -Ni                                                 | 1.0 M KOH | 280                                | <i>Small</i> , <b>2016</b> ,12, 2975.                    |
| Ni-Ni <sub>3</sub> S <sub>2</sub> /NF                                | 1.0 M KOH | 310                                | <i>Nano Conver.</i> <b>2017</b> , 4, 7.                  |
| Ni-Fe-Sn                                                             | 1.0 M KOH | 253                                | <i>Electrochimica Acta</i> , <b>2019</b> , 301, 39       |
| Co <sub>3</sub> O <sub>4</sub> /NiCo <sub>2</sub> O <sub>4</sub> /NF | 1.0M KOH  | 270                                | <i>ACS Sustain. Chem. Eng.</i> <b>2019</b> , 7,12214     |
| ACo <sub>2</sub> O <sub>4</sub> /NF                                  | 1.0 M KOH | 271                                | <i>Int. J. of Hydrogen Energ.</i> <b>2018</b> , 43,14360 |
| Co-P film                                                            | 1.0 M KOH | 345                                | <i>Angew. Chem., Int. Ed.</i> <b>2015</b> , 54, 6251     |
| NiSSe/NF                                                             | 1.0 M KOH | 247                                | <i>Int. J. of Energ. Res.</i> <b>2019</b> , 44,11        |
| Ni <sub>2</sub> P/NF                                                 | 1.0 M KOH | 290                                | <i>Energy Environ. Sci.</i> <b>2015</b> , 8, 2347        |
| CompactMoO <sub>2</sub> /NF                                          | 1.0 M KOH | 330                                | <i>Adv. Mater.</i> <b>2016</b> , 28, 3785                |

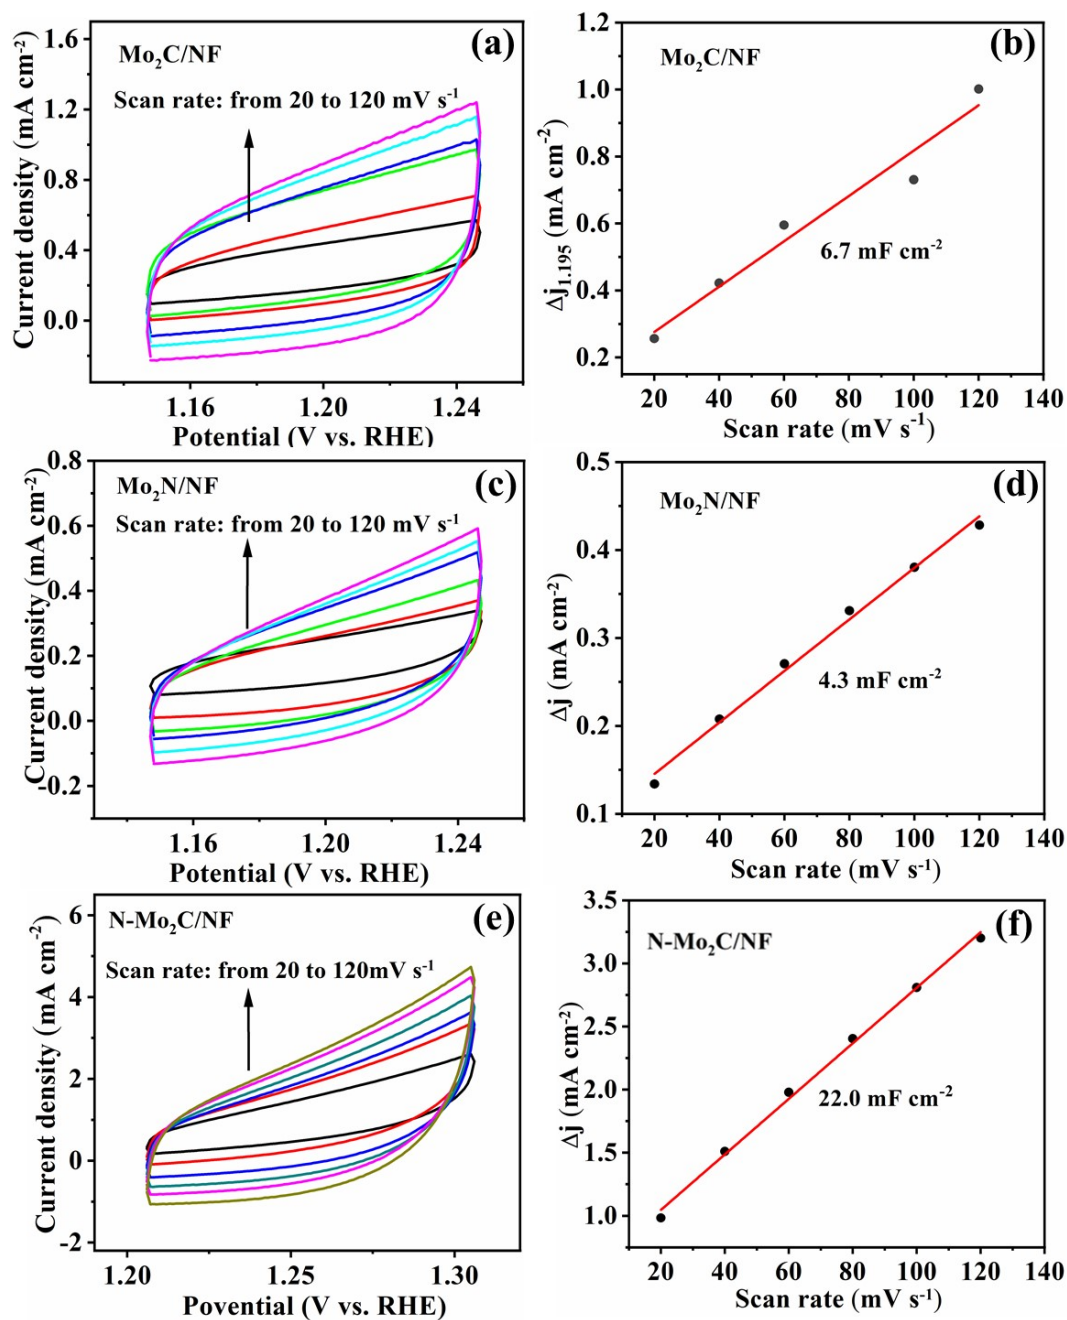

**Figure S12.** CV curves at different scan rates for (a) Mo<sub>2</sub>C/NF, (c) Mo<sub>2</sub>N/NF and (e) N-Mo<sub>2</sub>C/NF. (b, d, f) Capacitive  $i = i_a - i_c$  at the potential of 1.275 V vs. RHE plotted against scan rate fitted to estimate the electrochemical double-layer capacitances ( $C_{dl}$ ).

**Table 5** the  $R_s$ ,  $R_{ct}$  and CPE-P and CPE-T value of N-Mo<sub>2</sub>C/NF, Mo<sub>2</sub>C/NF, Mo<sub>2</sub>N/NF and Pt/C for OER.

| <b>Catalyst</b>        | <b><math>R_s</math></b> | <b><math>R_{ct}</math></b> | <b>CPE-P</b> | <b>CPE-T</b> |
|------------------------|-------------------------|----------------------------|--------------|--------------|
| N-Mo <sub>2</sub> C/NF | 1.614                   | 4.39                       | 0.546        | 0.169        |
| Mo <sub>2</sub> C/NF   | 1.754                   | 15.40                      | 0.831        | 0.002        |
| Mo <sub>2</sub> N/NF   | 2.164                   | 14.15                      | 0.541        | 0.499        |
| IrO <sub>2</sub>       | 1.776                   | 8.10                       | 0.749        | 0.001        |

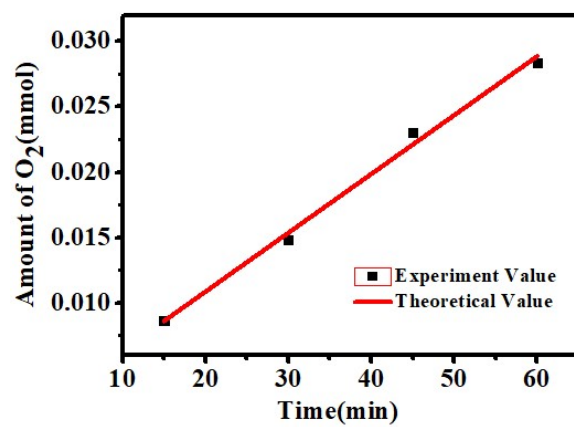

**Figure S13.** Theoretical and experimental tested O<sub>2</sub> evolution on N-Mo<sub>2</sub>C/NF.

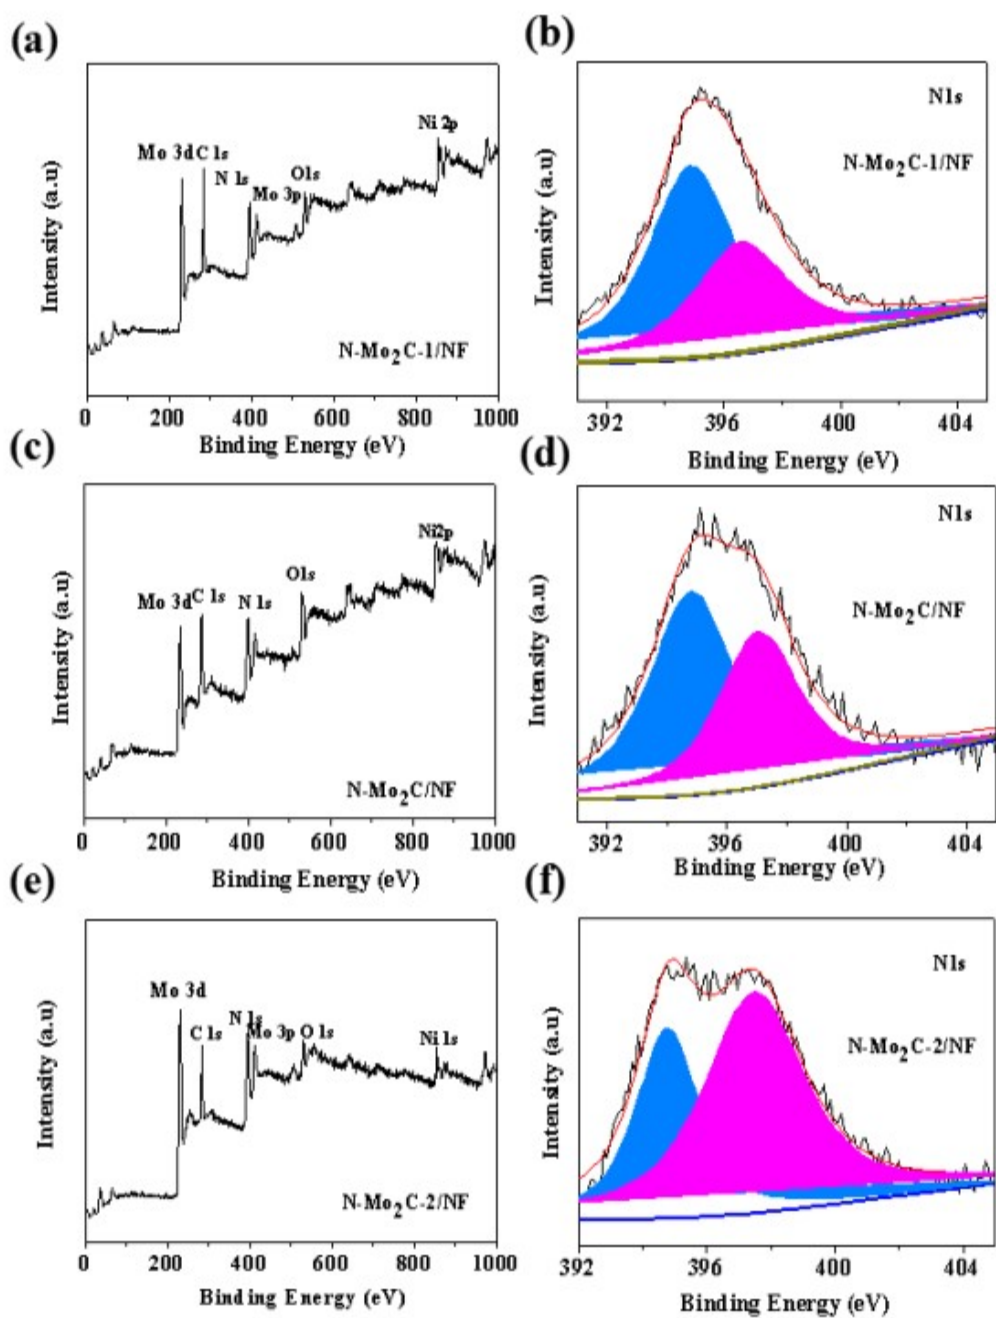

**Figure S14.** Full spectrum X-ray photoelectron spectroscopy (XPS) spectra of (a) N-Mo<sub>2</sub>C-1/NF, (c) N-Mo<sub>2</sub>C/NF and (e) N-Mo<sub>2</sub>C-3/NF. N 1s XPS spectra of (b) N-Mo<sub>2</sub>C-1/NF, (d) N-Mo<sub>2</sub>C/NF and (f) N-Mo<sub>2</sub>C/NF-3.

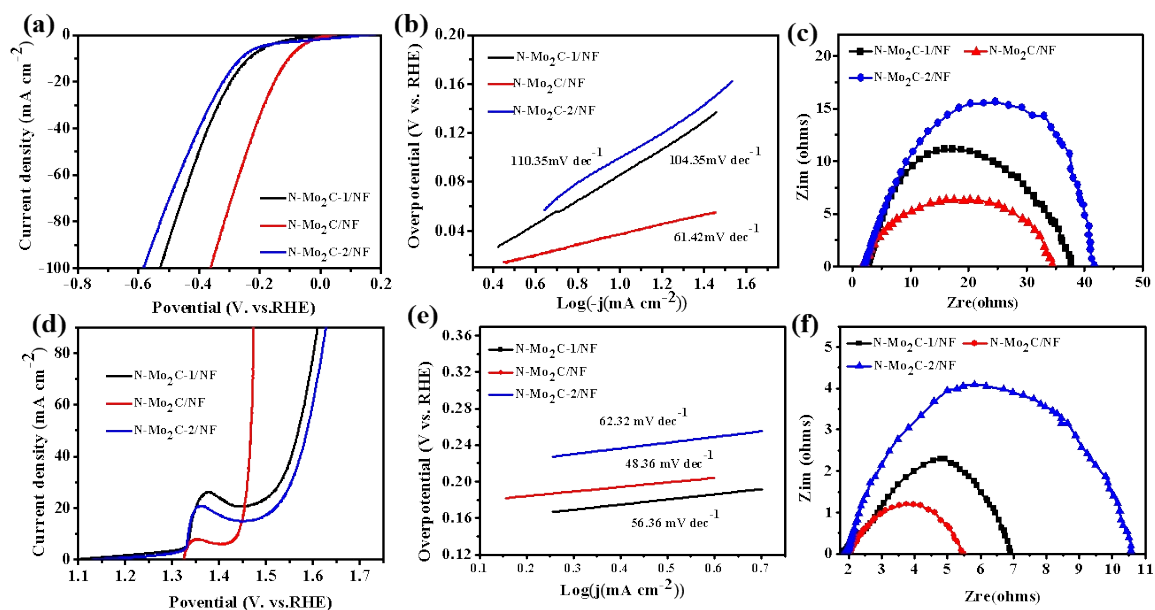

**Figure S15.** HER electrocatalytic performance. (a) Polarization curves of N-Mo<sub>2</sub>C-1/NF, N-Mo<sub>2</sub>C/NF and N-Mo<sub>2</sub>C-2/NF in 1.0 M KOH at scan of 5 mV s<sup>-1</sup>. (b) Corresponding Tafel plots. (c) Nyquist plots obtained at 200 mV overpotential. OER electrocatalytic performance. (d) Polarization curves of N-Mo<sub>2</sub>C-1/NF, N-Mo<sub>2</sub>C/NF and N-Mo<sub>2</sub>C-2/NF in 1.0 M KOH at scan of 5 mV s<sup>-1</sup>. (e) Corresponding Tafel plots and f) Nyquist plots.



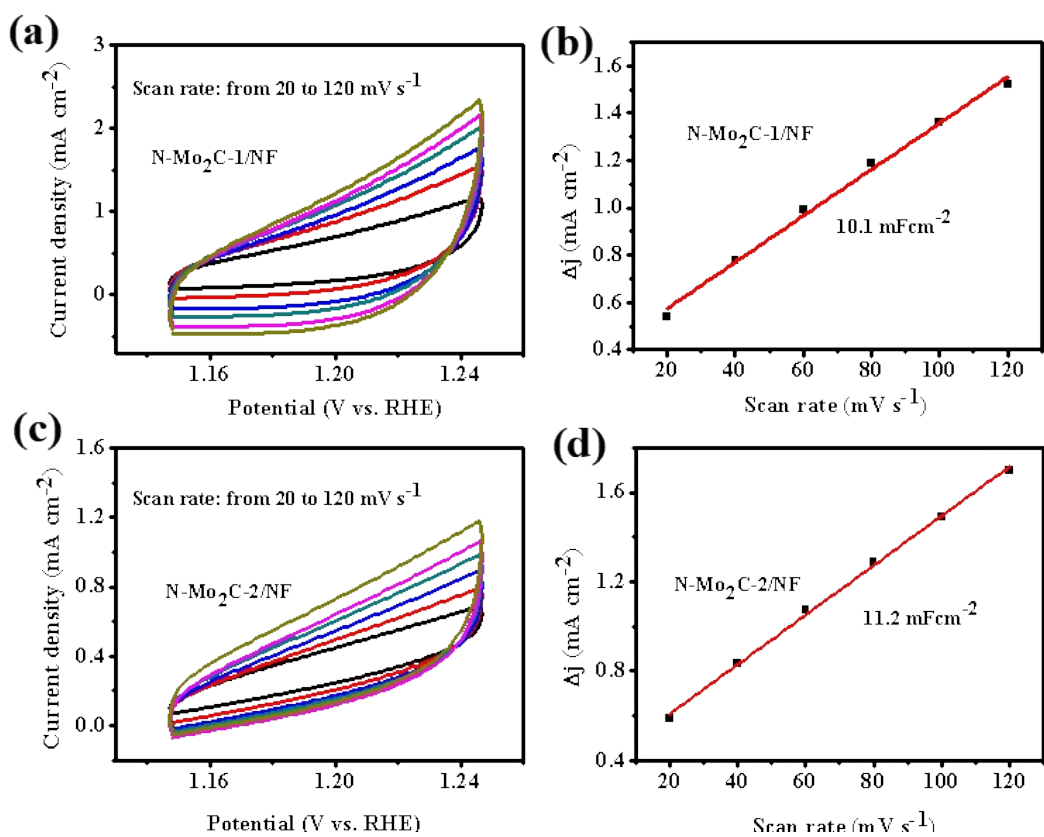

**Figure S16.** CV curves at different scan rates for (a) N-Mo<sub>2</sub>C-1/NF and (c) N-Mo<sub>2</sub>C-2/NF. (b, d) Capacitive  $i = i_a - i_c$  at the potential of 1.275 V vs. RHE plotted against scan rate fitted to estimate the electrochemical double-layer capacitances ( $C_{dl}$ ).

**Table S6.** Comparison of two electrode water splitting cell voltage of N-Mo<sub>2</sub>C/NF electrocatalyst with other nonprecious bifunctional electrocatalyst in 1 M KOH.

| Catalysts                                                 | Support | Overallvoltage<br>@-10 mA cm <sup>-2</sup> | Reference                                            |
|-----------------------------------------------------------|---------|--------------------------------------------|------------------------------------------------------|
| N-doped Mo <sub>2</sub> C/NF-12                           | Ni foam | 1.54V                                      | This work                                            |
| NiCo <sub>2</sub> S <sub>4</sub> NW                       | Ni foam | 1.63 V                                     | <i>Adv. Funct. Mater.</i> <b>2016</b> ,26, 4661      |
| NiSe nanowire film                                        | Ni foam | 1.63 V                                     | <i>Angew. Chem. Int. Ed.</i> <b>2015</b> , 54, 9351  |
| NiS/Ni foam                                               | Ni foam | 1.64 V                                     | <i>Chem. Commun.</i> <b>2016</b> . 52,1486           |
| Ni <sub>3</sub> S <sub>2</sub> Nanosheet Arrays           | Ni foam | 1.70 V                                     | <i>J. Am. Chem.Soc.</i> <b>2015</b> , 137, 14023     |
| NiCoP nanowire array                                      | Ni foam | 1.64 V                                     | <i>J. Mater. Chem. A</i> <b>2017</b> , 5, 14828.     |
| Ni-Fe-O nanowires                                         | Ni foam | 1.64 V                                     | <i>Adv. Energy Mater.</i> <b>2017</b> , 8, 1701347   |
| Fe-MoS <sub>2</sub> /Ni <sub>3</sub> S <sub>2</sub> /NF-2 | Ni foam | 1.61 V                                     | <i>Dalton Transactions</i> , <b>2019</b> , 48. 12186 |
| NS-MnO <sub>2</sub>                                       | Ni foam | 1.61 V                                     | <i>Adv. Energy Mater.</i> <b>2017</b> , 7, 1700005   |
| Co-P films                                                | Cu foam | 1.64 V                                     | <i>Angew. Chem.</i> <b>2015</b> , 127, 6349          |

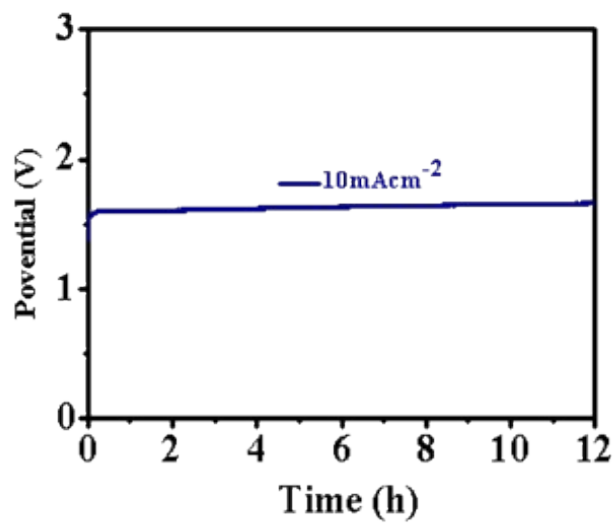

**Figure S17.** Long-term durability of N-Mo<sub>2</sub>C/NF overall water splitting at a current density of 10 mA cm<sup>-2</sup>.

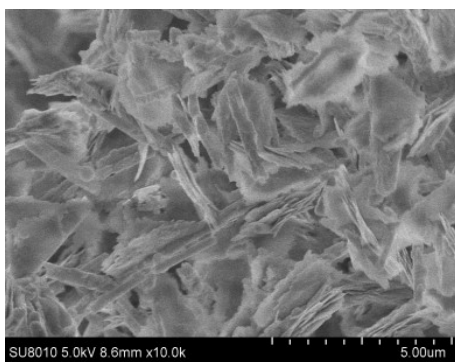

**Figure S18.** SEM image of N-Mo<sub>2</sub>C/NF after overall water splitting reaction.

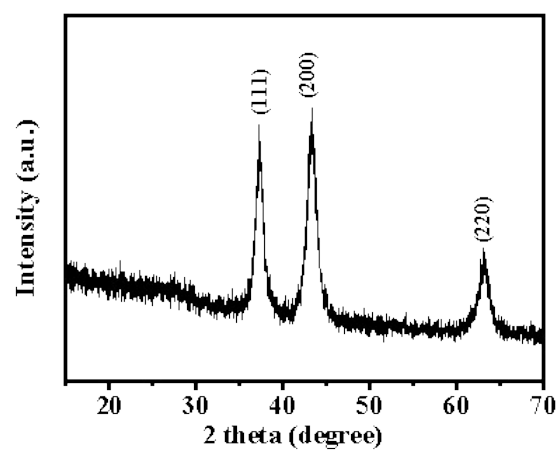

**Figure S19.** XRD of N-Mo<sub>2</sub>C after overall water splitting reaction.

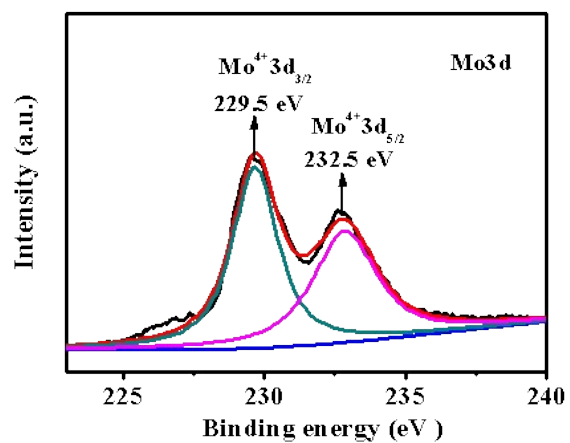

**Figure S20.** XPS spectra of Mo3d for N-Mo<sub>2</sub>C/NF after overall water splitting reaction.

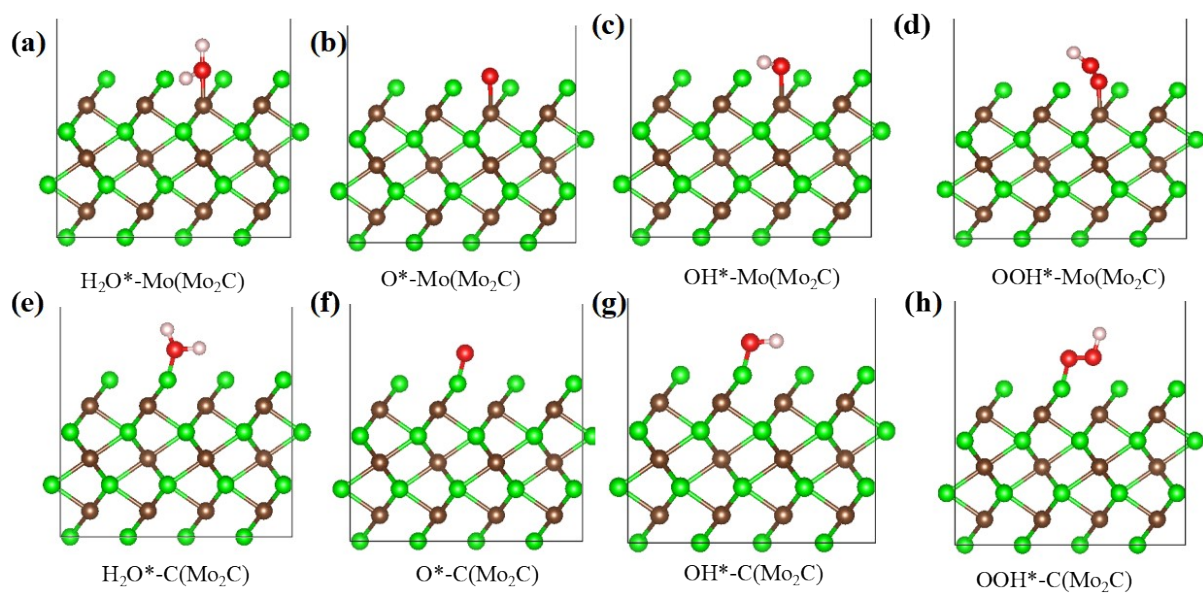

**Figure S21.** Chemisorption models of  $\text{H}_2\text{O}^*$ ,  $\text{O}^*$ ,  $\text{OH}^*$  and  $\text{OOH}^*$  intermediates on the surfaces of  $\text{Mo}_2\text{C}$  respectively

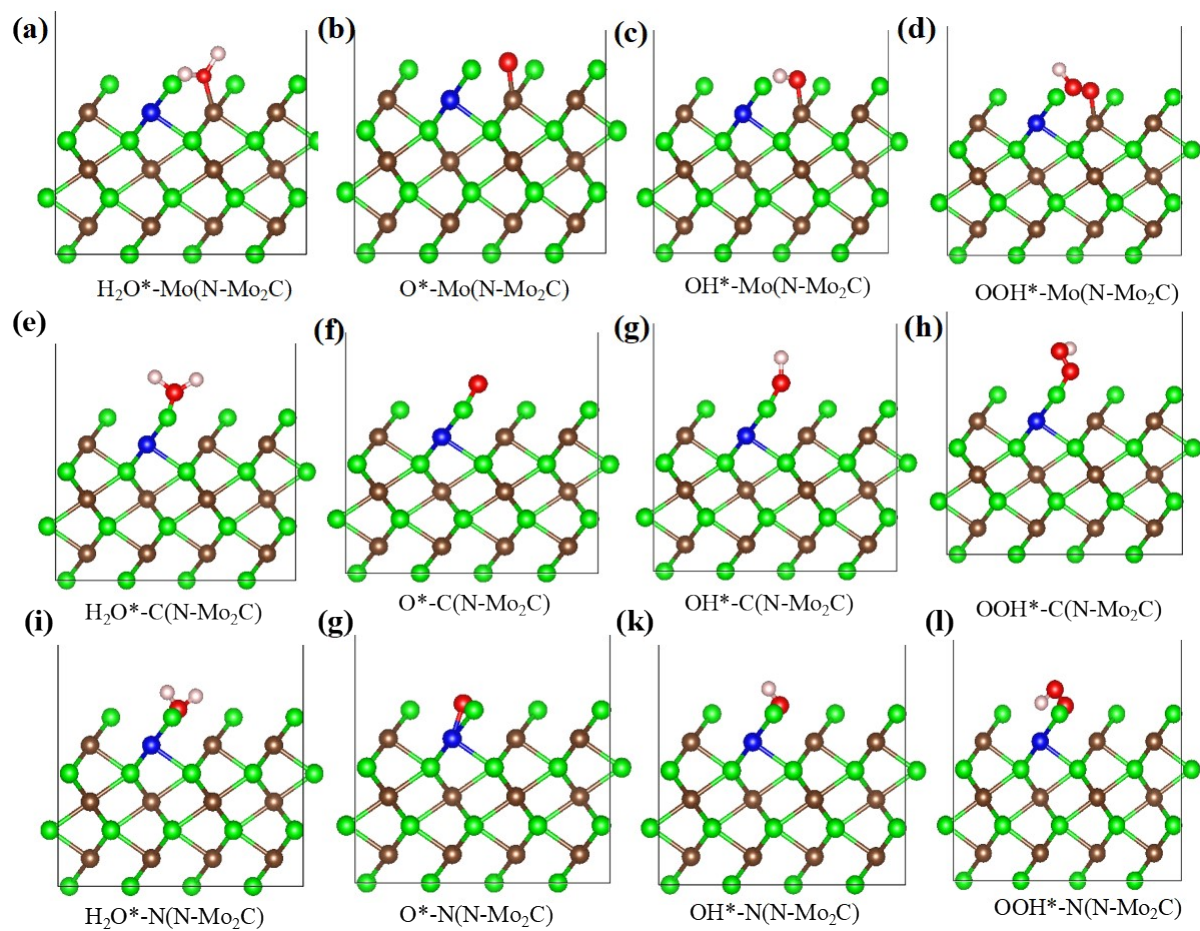

**Figure S22.** Chemisorption models of  $\text{H}_2\text{O}^*$ ,  $\text{O}^*$ ,  $\text{OH}^*$  and  $\text{OOH}^*$  intermediates on the surfaces of  $\text{N-Mo}_2\text{C}$  respectively



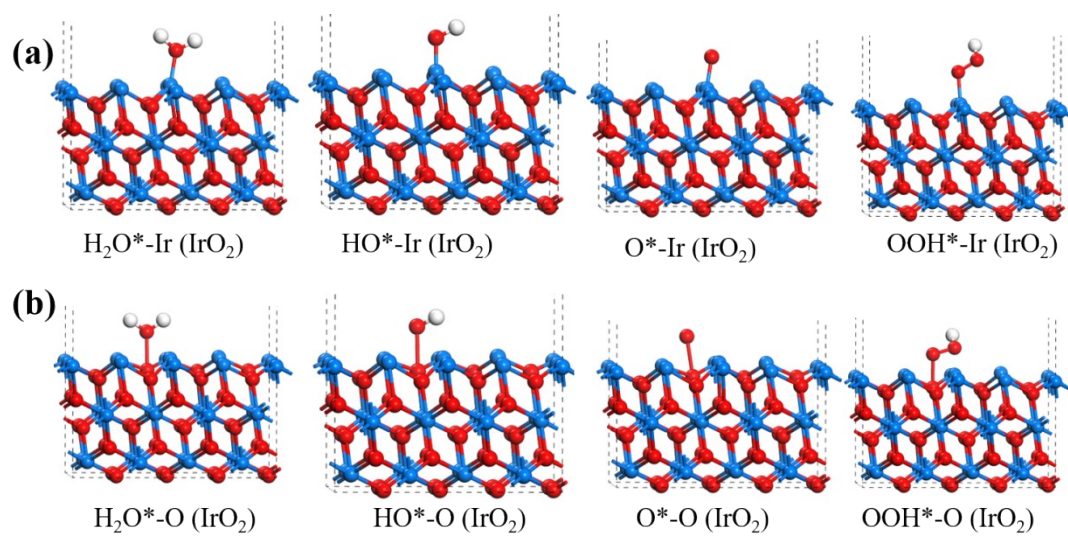

**Figure S23.** Chemisorption models of  $\text{H}_2\text{O}^*$ ,  $\text{OH}^*$ ,  $\text{O}^*$ , and  $\text{OOH}^*$  intermediates on the surfaces of N-Mo<sub>2</sub>C respectively.

**Table S7.** Reaction (free) energy on the Mo<sub>2</sub>C, N-Mo<sub>2</sub>C and IrO<sub>2</sub>

| Catalyst                           | H <sub>2</sub> O(l) → OH* | OH* → O* | O* → OOH* | OOH* → O <sub>2</sub> |
|------------------------------------|---------------------------|----------|-----------|-----------------------|
| C-active site Mo <sub>2</sub> C    | 1.21                      | 0.85     | 1.69      | 1.17                  |
| Mo-active site Mo <sub>2</sub> C   | 0.82                      | 1.01     | 1.56      | 1.53                  |
| C-active site N-Mo <sub>2</sub> C  | 1.05                      | 0.96     | 1.62      | 1.29                  |
| Mo-active site N-Mo <sub>2</sub> C | 0.62                      | 1.36     | 1.45      | 1.49                  |
| N-active site N-Mo <sub>2</sub> C  | 0.76                      | 1.18     | 1.58      | 1.40                  |
| Ir-active site IrO <sub>2</sub>    | 0.70                      | 1.30     | 1.46      | 1.46                  |

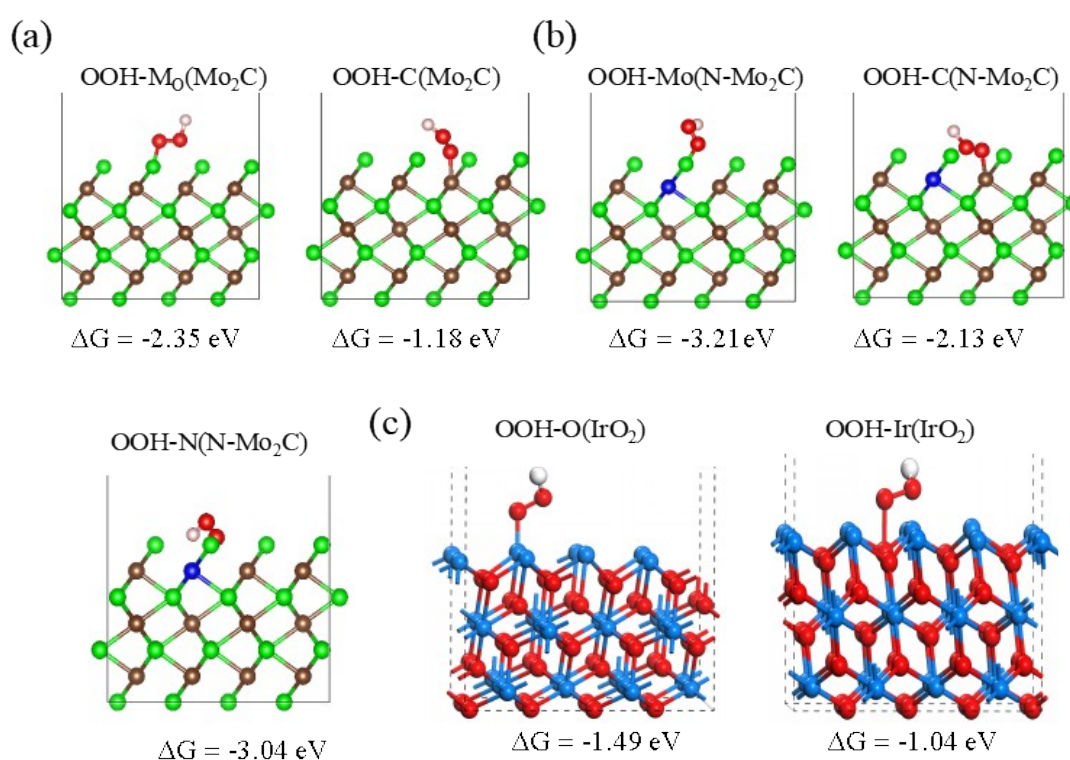

**Figure S24.** Chemisorption models of OOH\* on the surfaces of Mo<sub>2</sub>C, N-Mo<sub>2</sub>C, and IrO<sub>2</sub> respectively.

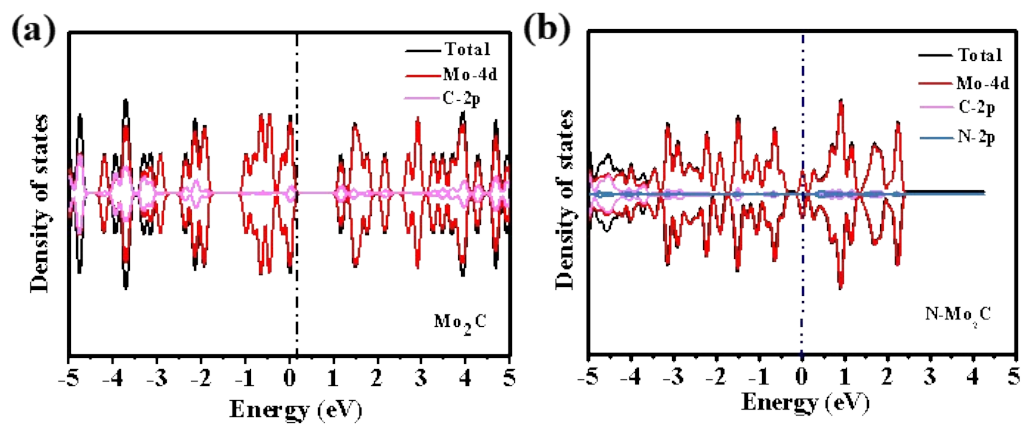

Figure S25. Density of state for  $\text{Mo}_2\text{C}$  and  $\text{N-Mo}_2\text{C}$ .

## References

- [1] a) L. Feng, A. Li, Y. Li, J. Liu, L. Wang, L. Huang, Y. Wang, X. Ge, *ChemPlusChem* **2017**, *82*, 483; b) H. Liu, X. Peng, X. Liu, G. Qi, J. Luo, *ChemSusChem* **2019**, *12*, 1334.
- [2] X. Sun, Q. Shao, Y. Pi, J. Guo, X. Huang, *J. Mater. Chem. A* **2017**, *5*, 7769.
- [3] Y. Chen, Z. Ren, H. Fu, X. Zhang, G. Tian, H. Fu, *Small*, **2018**, 1800763
- [4] G. Kresse, J. Hafner, *Phys. Rev. B* **1994**, *49*, 14251; b) C. Zhu, A. L. Wang, W. Xiao, D. Chao, X. Zhang, N. H. Tiep, S. Chen, J. Kang, X. Wang, J. Ding, J. Wang, H. Zhang, H. J. Fan, *Adv. Mater.* **2018**, *30*, 170551.
